# Supplementary material
Source: PubMed Central journal article supplement (PMC3066027)
Supplement: NIHMS279828-supplement-Supplement_Legend.pdf [file NIHMS279828-supplement-Supplement_Legend.pdf]

## Supplementary Video Legends

### **Supplemental Video 1. HMGB1 is released from dying cells after chemotherapy treatment.**

*hmgbl<sup>-/-</sup>* MEFs were transfected with GFP-HMGB1 and treated with MAF in the presence of PI and the live cell permeant DNA dye Hoechst 33342. Live cell imaging was performed. Videos with different color channels are shown. (A) GFP-HMGB1; (B) Propidium iodide for plasma membrane integrity; (C) Merged images with GFP-HMGB1 and PI; (D) Hoechst 33342 for nuclear staining. Note the simultaneous decrease of cellular GFP-HMGB1 and loss of plasma membrane integrity indicated by PI positive staining.
